# Supplementary material for: Sphingosine 1-Phosphate Receptor Blockade Affects Pro-Inflammatory Bone Marrow-Derived Macrophages and Relieves Mouse Fatty Liver Injury
Source: MDPI journal article supplement (doi:10.3390/ijms20194695), 2019-09-22
Supplement: s1 [file s1]

**A**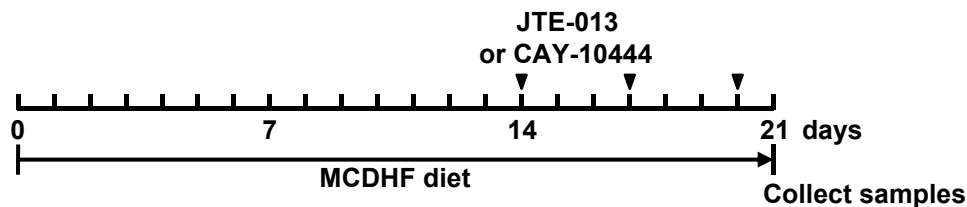**B**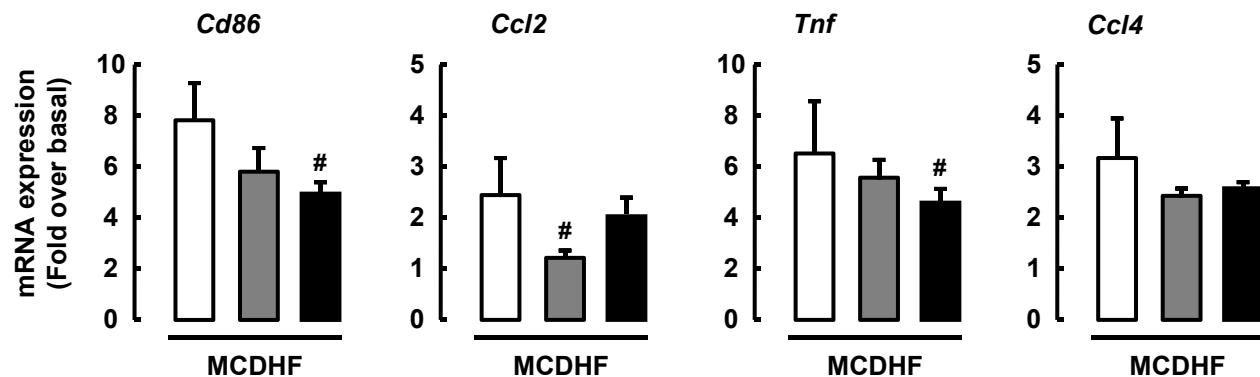**C**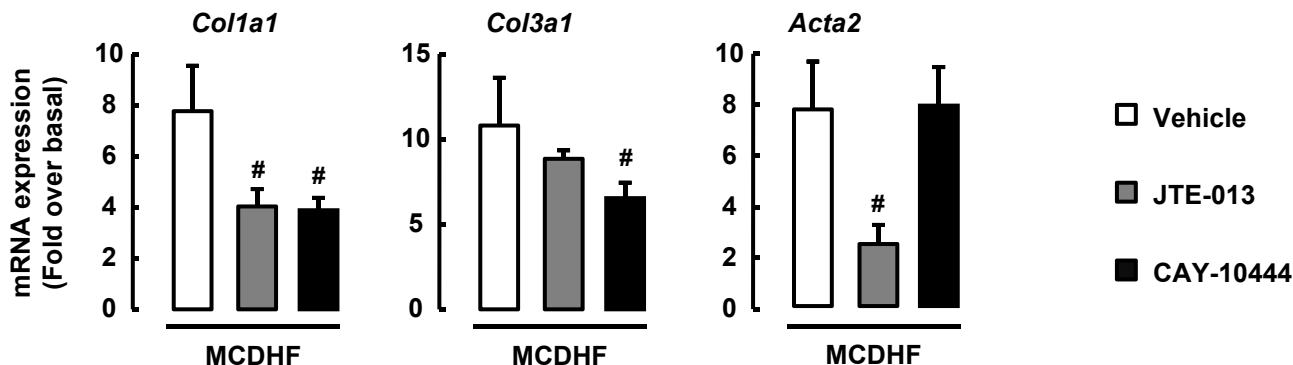

**Supplemental Figure 2. Therapeutic injection of S1PR2/3 inhibitors decreases hepatic inflammation and fibrogenesis in the MCDHF diet-fed mice.**

(A) Scheme of the mouse model. (B) The mRNA expressions of pro-inflammatory factors in the liver from vehicle, JTE-013-, CAY-10444-treated mice after 14 days of Ctrl or MCDHF diet feeding. (C) The mRNA expressions of fibrotic genes in the liver from vehicle, JTE-013-, CAY-10444-treated mice after 14 days of Ctrl or MCDHF diet feeding. Data are presented as the means  $\pm$  SEM. \* $P < 0.05$  vs. Ctrl group. #  $P < 0.05$  vs. MCDHF diet group (n=6 for each group in each experiment).
