# Supplementary material for: Sphingosine 1-Phosphate Receptor Blockade Affects Pro-Inflammatory Bone Marrow-Derived Macrophages and Relieves Mouse Fatty Liver Injury
Source: MDPI journal article supplement (doi:10.3390/ijms20194695), 2019-09-22
Supplement: s1 [file s1]

**A**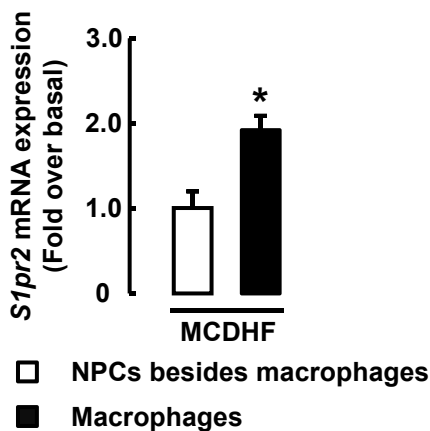**B**

|            | EGFP <sup>+</sup> cell count | Total cell count | Ratio of EGFP <sup>+</sup> cell |
|------------|------------------------------|------------------|---------------------------------|
| Ctrl       | 397                          | 574              | 69.13%                          |
| MCDHF diet | 475                          | 657              | 72.39%                          |

**C**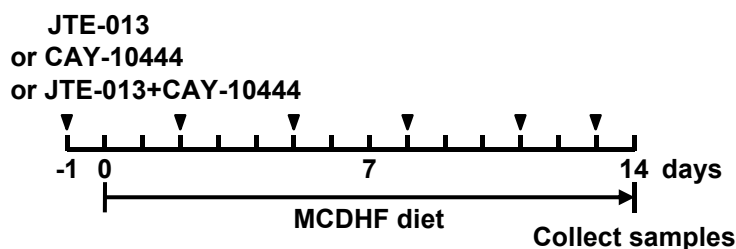**D**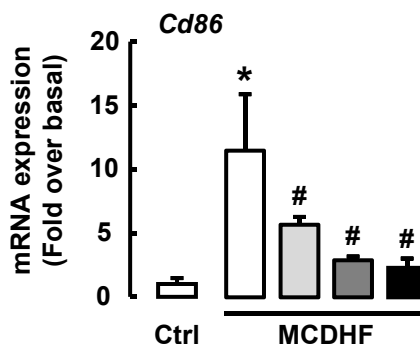**E**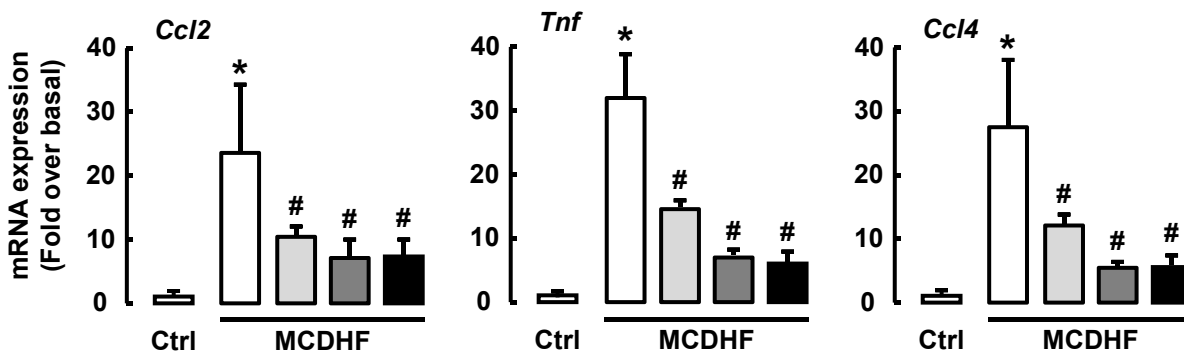**F**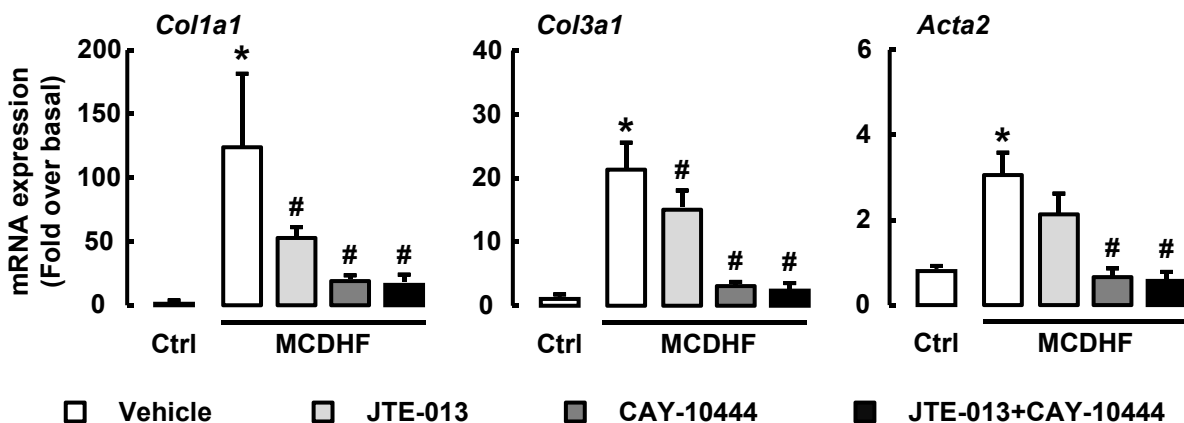

**Supplemental Figure 1. S1PR2/3 blockade decrease hepatic inflammation and fibrogenesis in the MCDHF diet-fed mice.**

(A) MCDHF diet-fed mice were subjected to liver perfusion with 0.4% collagenase buffer. NPCs were separated using low-speed centrifugation and 40% percoll density gradient centrifugation. F4/80 was used to sorted macrophages using FACS. Then S1pr2 mRNA expression in macrophages or remaining NPCs were examined. (B) The ratio of EGFP<sup>+</sup> cells in the blood. (C) Scheme of the mouse model. (D-F) The mRNA expressions of Cd86 (D), pro-inflammatory factors (E), and fibrotic genes (F) in the liver from vehicle, JTE-013-, CAY-10444-, and JTE-013+CAY-10444-treated mice after 14 days of Ctrl or MCDHF diet feeding. Data are presented as the means  $\pm$  SEM. \* $P$ <0.05 vs. Ctrl group. #  $P$ <0.05 vs. MCDHF diet group (n=6 for each group in each experiment).
